# Supplementary material for: Enhanced photoelectrochemical water splitting performance using morphology-controlled BiVO4 with W doping
Source: publisher site journal article supplement (doi:10.3762/bjnano.8.264), 2017-12-07
Supplement: Additional file 1 [file 2190-4286-8-264-S1.pdf]

# **Supporting Information**

for

## **Enhanced photoelectrochemical water splitting performance using morphology-controlled BiVO<sub>4</sub> with W doping**

Xin Zhao and Zhong Chen\*

Address: School of Materials Science and Engineering, Nanyang Technological University,  
50 Nanyang Avenue, 639798, Singapore, Singapore

Email: Zhong Chen - ASZChen@ntu.edu.sg

\* Corresponding author

### **Additional experimental data**

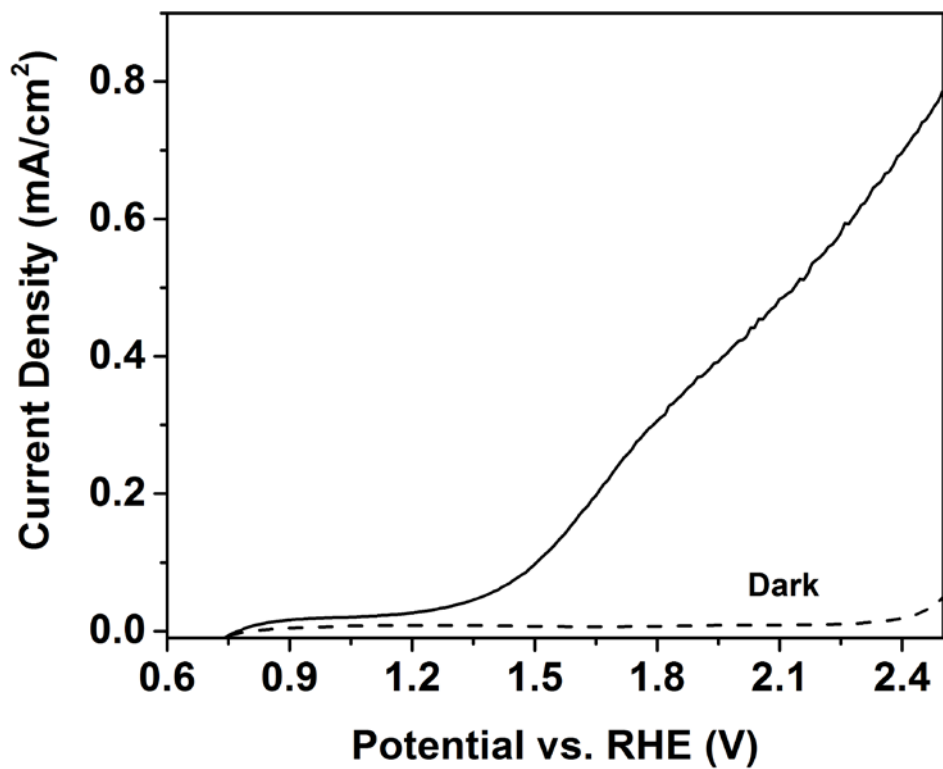

**Figure S1:** Photocurrent of pristine BiVO<sub>4</sub> under AM 1.5G solar light.

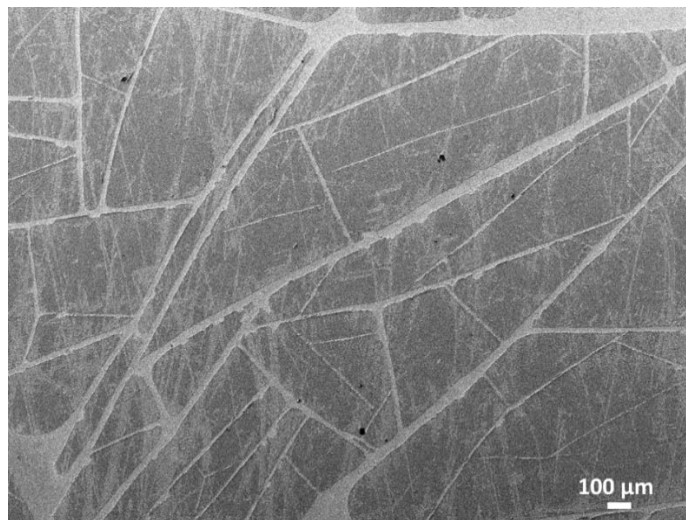

**Figure S2:** SEM image of 0.5-EG sample at low magnification.

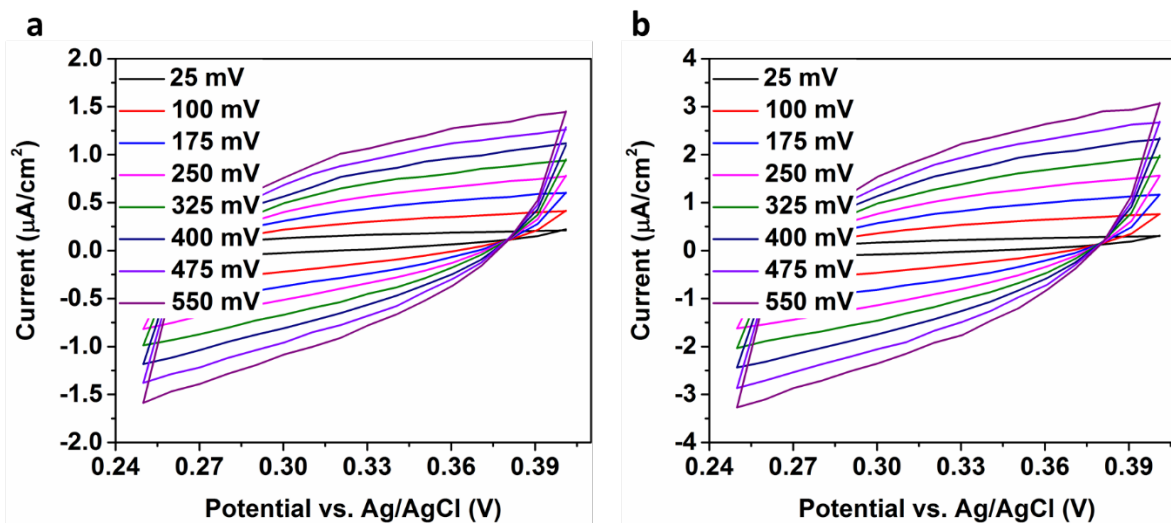

**Figure S3:** Cyclic voltammograms of (a) W doped BiVO<sub>4</sub> with planar (0-water) and (b) nanoporous structure (1-EG) measured at different scan rates from 25 to 550 mV·s<sup>-1</sup>.

**Table S1:** Elemental analysis of 0-water sample by EDX.

| Element | Intensity | Wt %  | Atom % |
|---------|-----------|-------|--------|
| O       | 0.65      | 17.42 | 64.14  |
| V       | 0.96      | 14.31 | 16.55  |
| Bi      | 0.91      | 66.46 | 18.73  |
| W       | 0.78      | 1.80  | 0.58   |
| Total   |           | 100   |        |

**Table S2:** Elemental analysis of 1-EG sample by EDX.

| Element | Intensity | Wt %  | Atom % |
|---------|-----------|-------|--------|
| O       | 0.65      | 17.28 | 63.91  |
| V       | 0.96      | 14.32 | 16.64  |
| Bi      | 0.91      | 66.35 | 18.79  |
| W       | 0.79      | 2.06  | 0.66   |
| Total   |           | 100   |        |
